# Supplementary material for: Enhanced fluorescence and chiral discrimination for tartaric acid in a dual fluorophore boronic acid receptor
Source: Royal Society of Chemistry journal article supplement (doi:10.1039/b418279k), 2005-01-01
Supplement: b418279k.pdf [file b418279k.pdf]

## Supplemental Information

Selected data for *R,R*-**2**:  $^1\text{H}$  NMR (300 MHz,  $\text{CDCl}_3$ )  $\delta$  7.85–7.16 (m, 30H),  $\delta$  4.44–4.67 (m, 4H),  $\delta$  4.13 (br, 2H),  $\delta$  3.77 (br, 4H), 1.73 (d, 6H,  $J = 6.0$  Hz) ppm; FAB-LRMS ( $\text{C}_{82}\text{H}_{70}\text{B}_2\text{N}_6\text{O}_{12}$ , 3-nitrobenzylalcohol adduct) calcd 1352.5, found 1352.9. Anal Calcd for  $\text{C}_{54}\text{H}_{50}\text{B}_2\text{N}_2\text{O}_4$ : C, 79.8; H, 6.20; N, 3.45. Found: C, 79.4, H, 6.21; N, 3.45.  $[\alpha]_{\text{D}}^{22} = -100 \pm 2^\circ$  ( $c = 0.5$ , dichloromethane).

Selected data for *S,S*-**2**:  $^1\text{H}$  NMR (300 MHz,  $\text{CDCl}_3$ )  $\delta$  7.83–7.13 (m, 30H),  $\delta$  4.43–4.65 (m, 4H),  $\delta$  4.09 (br, 2H),  $\delta$  3.77 (br, 4H), 1.71 (d, 6H,  $J = 6.0$  Hz) ppm; FAB-LRMS ( $\text{C}_{82}\text{H}_{70}\text{B}_2\text{N}_6\text{O}_{12}$ , 3-nitrobenzylalcohol adduct) calcd 1352.5, found 1353.0. Anal Calcd for  $\text{C}_{54}\text{H}_{50}\text{B}_2\text{N}_2\text{O}_4 \cdot 0.1\text{CH}_2\text{Cl}_2$ : C, 79.1; H, 6.16; N, 3.41. Found: C, 79.0, H, 6.11; N, 3.36.  $[\alpha]_{\text{D}}^{22} = +92 \pm 2^\circ$  ( $c = 0.5$ , dichloromethane).

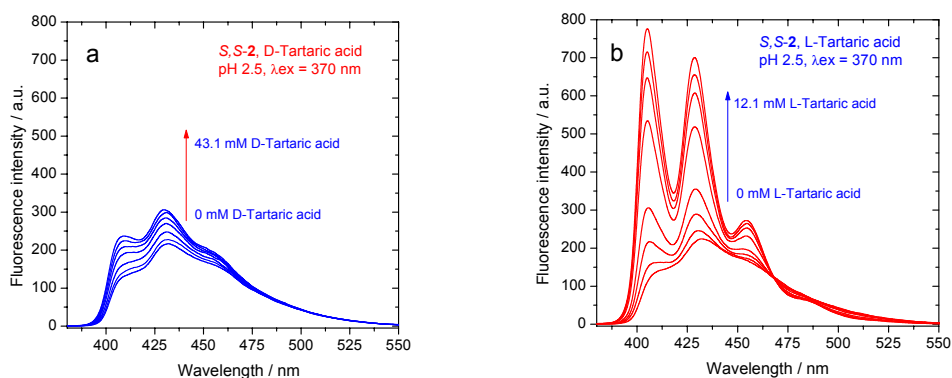

Figure 1. Emission spectra of *S,S*-**2** in the presence of tartaric acid. a), *S,S*-**2** with D-tartaric acid; b), *S,S*-**2** with L-tartaric acid,  $\lambda_{\text{ex}}$  at 370 nm, pH 2.5.  $3.0 \times 10^{-6}$  mol dm<sup>-3</sup> of sensors in  $5.0 \times 10^{-2}$  mol dm<sup>-3</sup> NaCl solution (52.1% methanol in water). 18°C.

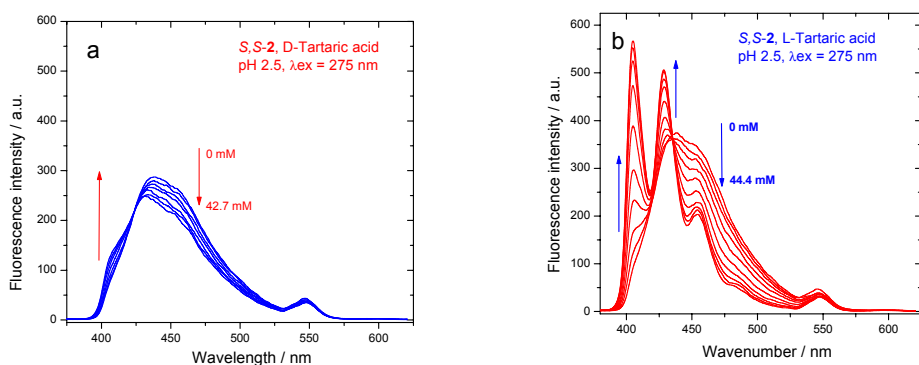

Figure 2. Emission spectra of *S,S*-**2** in the presence of tartaric acid. a), *S,S*-**2** with D-tartaric acid; b), *S,S*-**2** with L-tartaric acid,  $\lambda_{\text{ex}}$  at 275 nm, pH 2.5.  $1.0 \times 10^{-6}$  mol dm<sup>-3</sup> of sensors in  $5.0 \times 10^{-2}$  mol dm<sup>-3</sup> NaCl ionic buffer (52.1% methanol in water). 23°C.

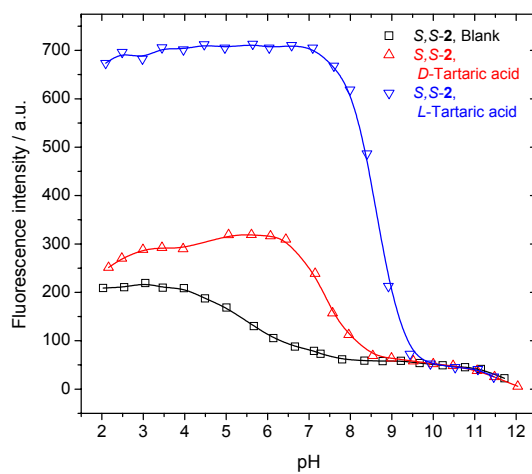

Figure 3. Fluorescence intensity-pH profile of the *S,S*-2 with D- and L-tartaric acid;  $3.0 \times 10^{-6}$  mol dm<sup>-3</sup> of sensor in 0.05 mol dm<sup>-3</sup> sodium chloride ionic buffer (52.1% methanol), [L- and D-Tartaric acid] = 0.05 M.  $\lambda_{\text{ex}}$  370 nm,  $\lambda_{\text{em}}$  429 nm. 22°C.

*S*-sensor, apparent  $pK_a = 5.72 \pm 0.07$ ,  $r^2 = 0.98$

*L*-acid, apparent  $pK_a = 7.42 \pm 0.04$ ,  $r^2 = 0.998$

*D*-acid, apparent  $pK_a = 8.65 \pm 0.04$ ,  $r^2 = 0.995$

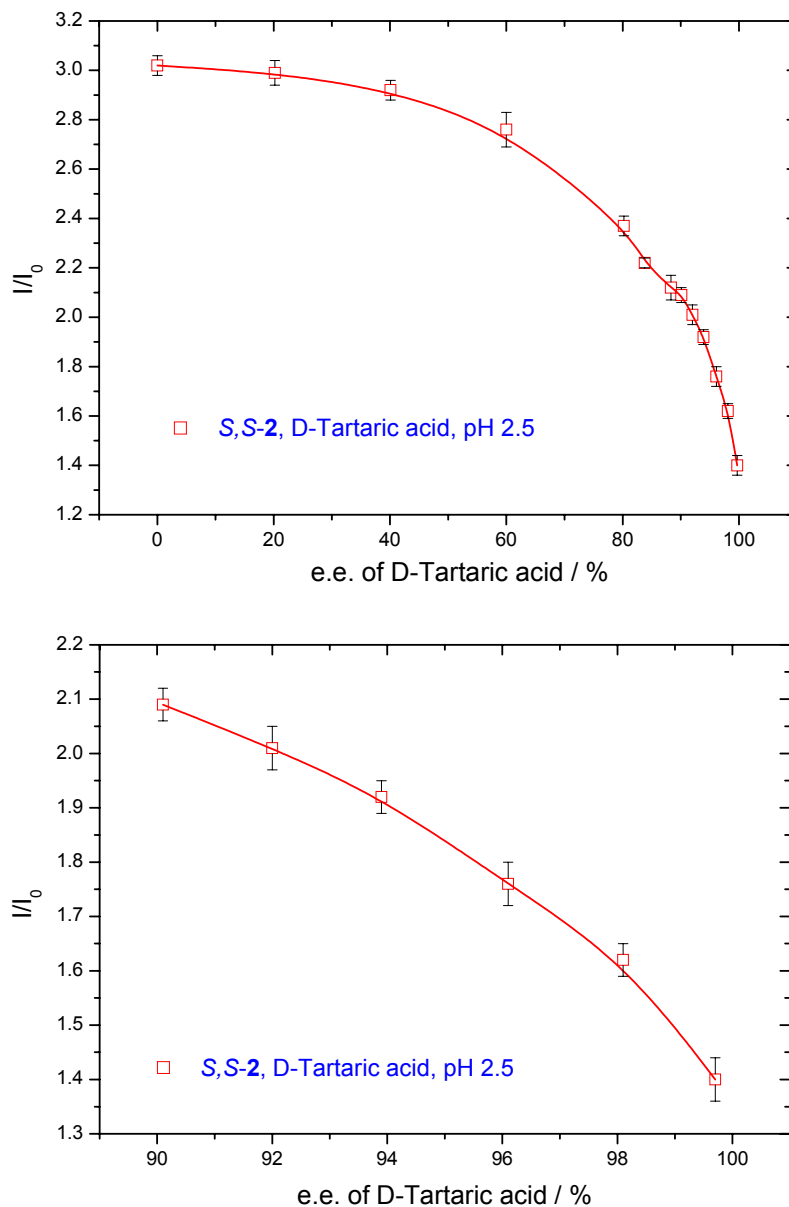

Figure 4. Fluorescence intensity changes of *S,S*-2- vs enantiomeric composition of D-Tartaric acid.  $3.0 \times 10^{-6}$  mol dm<sup>-3</sup> of *S*-sensor in  $5.0 \times 10^{-2}$  mol dm<sup>-3</sup> M NaCl buffer (52.1% methanol in water),  $\lambda_{\text{ex}}$  370 nm,  $\lambda_{\text{em}}$  429 nm, pH 2.5, 20°C. [D-Tartaric acid] + [L-Tartaric acid] =  $6.0 \times 10^{-2}$  mol dm<sup>-3</sup>. The variation of the e.e. value of the D-tartaric acid was achieved with mixing the D-Tartaric acid and the L-Tartaric acid.

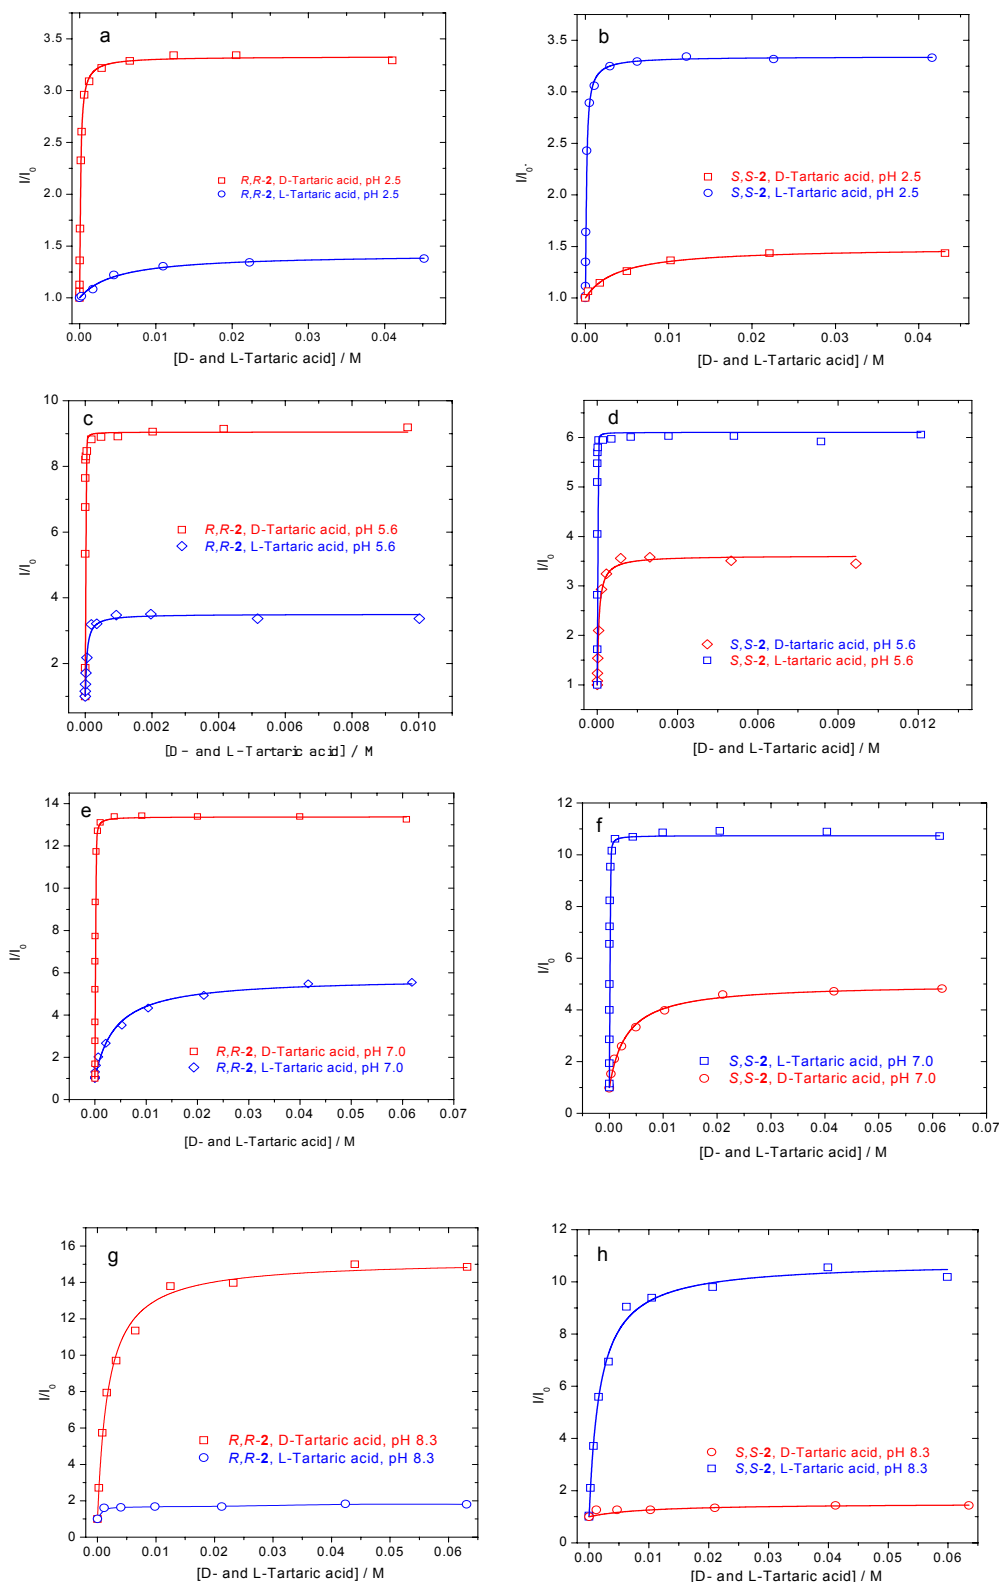

Figure 5. Fluorescence intensity of the  $R,R-2$  and  $S,S-2$  vs. concentration of D- or L-Tartaric acid.  $3.0 \times 10^{-6}$  mol  $\text{dm}^{-3}$  of sensor in  $0.05$  mol  $\text{dm}^{-3}$  sodium chloride ionic buffer (52.1% methanol), [D- or L-Tartaric acid] = 0-0.01 M. The solid lines are the 1:1 binding regression results.  $\lambda_{\text{ex}}$  370 nm,  $\lambda_{\text{em}}$  429 nm. 22°C. pH 2.5, 5.6, 7.0, 8.3.
